# Supplementary material
Source: PubMed Central journal article supplement (PMC6063525)
Supplement: NIHMS973611-supplement-4.pdf [file NIHMS973611-supplement-4.pdf]

SUPPLEMENTARY FIGURES

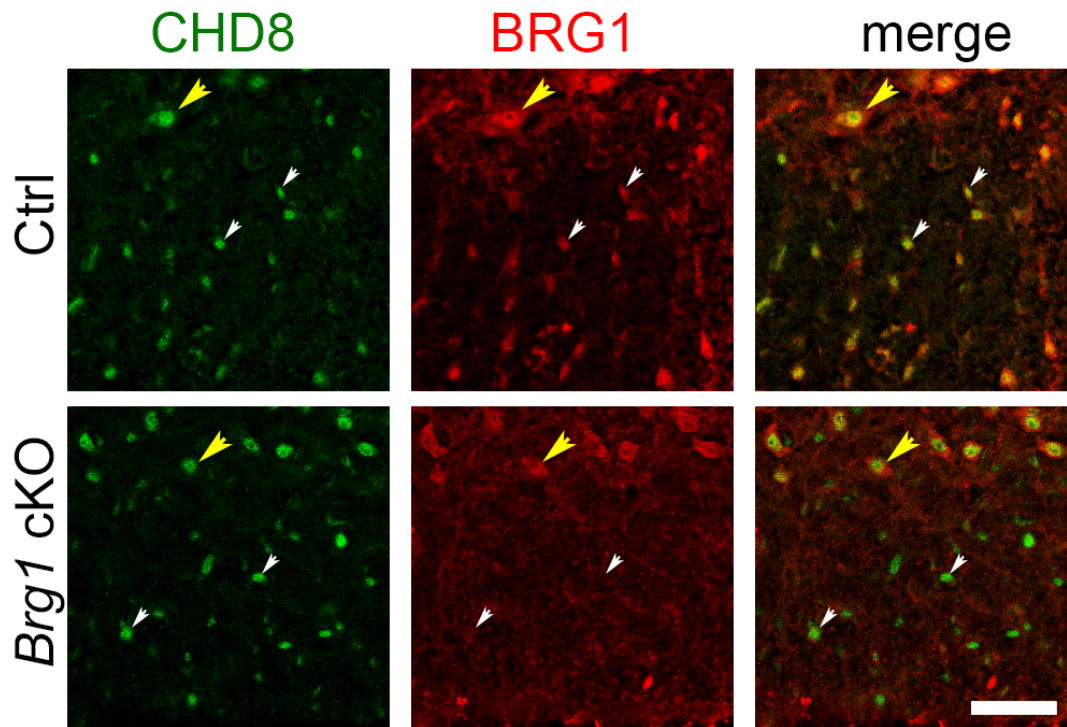

**Figure S1. BRG1 and CHD8 expression in the spinal cord of *Brg1* cKO mice. Related to Figure 1.**

The spinal cord sections of control and *Brg1* cKO mice at P7 were stained with BRG1 and CHD8. Scale bar, 50  $\mu$ m.

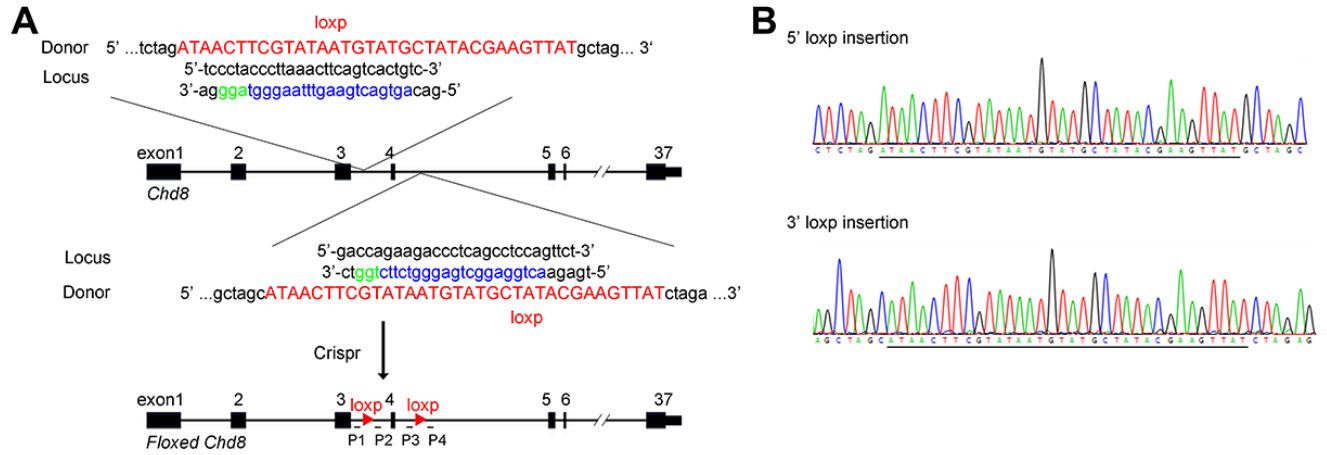

**Figure S2. Generation and validation of mice carrying floxed *Chd8* alleles. Related to Figure 2.**

- A) Diagram depicting generation of *Chd8* allele with floxed exon 4 with CRISPR-Cas9 method.
- B) Chromatogram of Sanger sequencing validation of loxp site insertion flanking the exon 4 of *Chd8* in mouse genome.

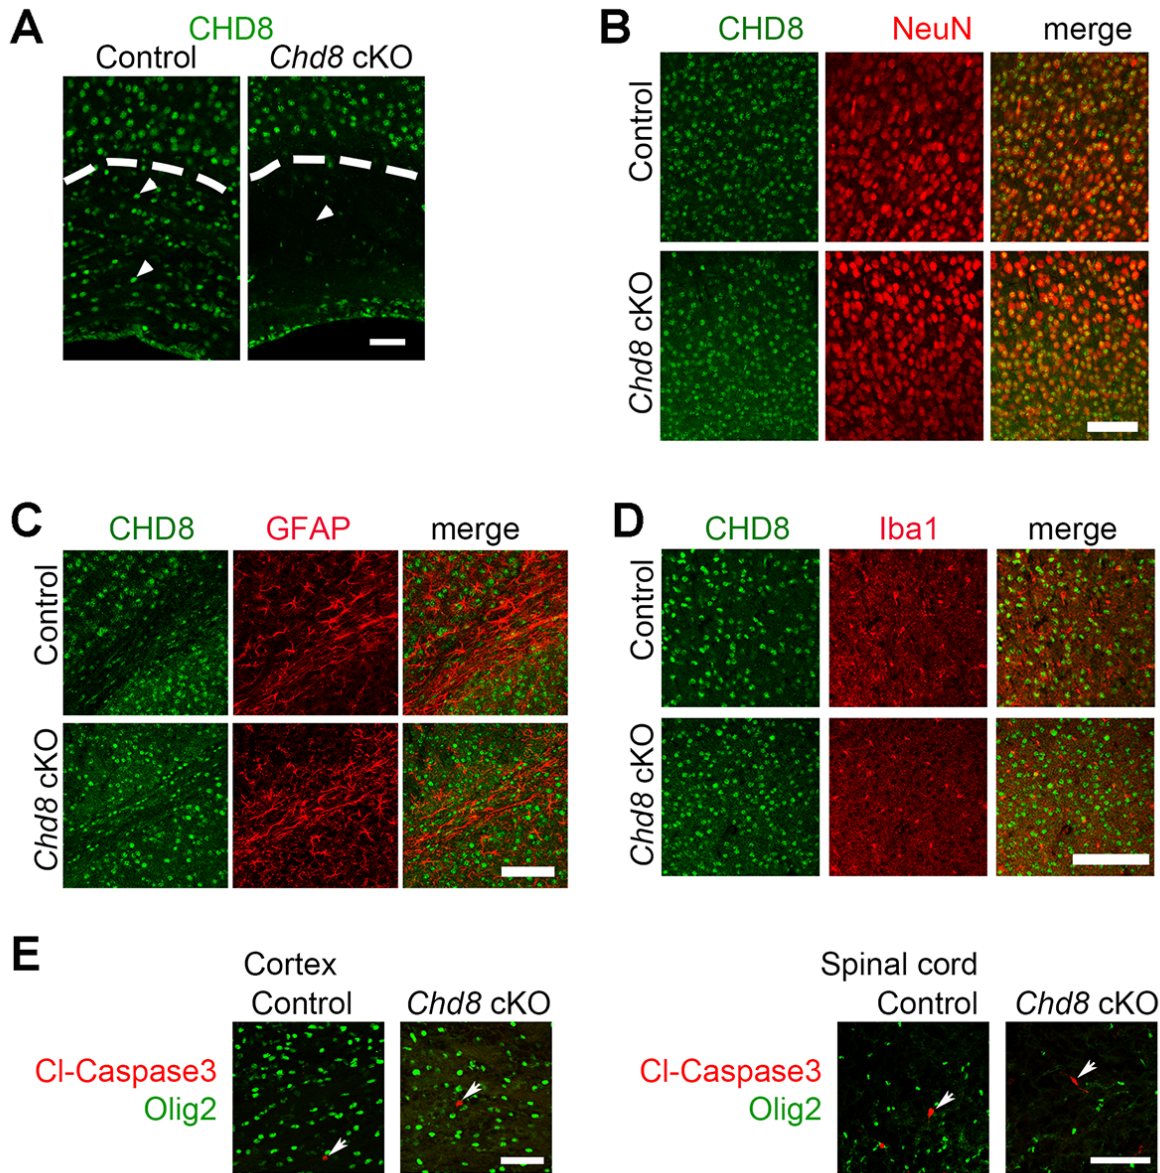

**Figure S3. Extended analysis of *Chd8* cKO mice. Related to Figure 3.**

A) The cortical sections of control and *Chd8* cKO mice at P14 were stained with CHD8. Scale bar, 100  $\mu$ m.

B-D) The cortices of control and *Chd8* cKO mice at P14 were stained with the neuronal marker NeuN (B), astrocyte marker GFAP (C), microglia marker Iba1 (D). Scale bar, 100  $\mu$ m.

E) The cortical and spinal cord sections of control and *Chd8* cKO mice at P1 were stained with Olig2 and an apoptotic cell marker, a cleaved form of caspase 3 (cl-caspase 3). Scale bar, 100  $\mu$ m.

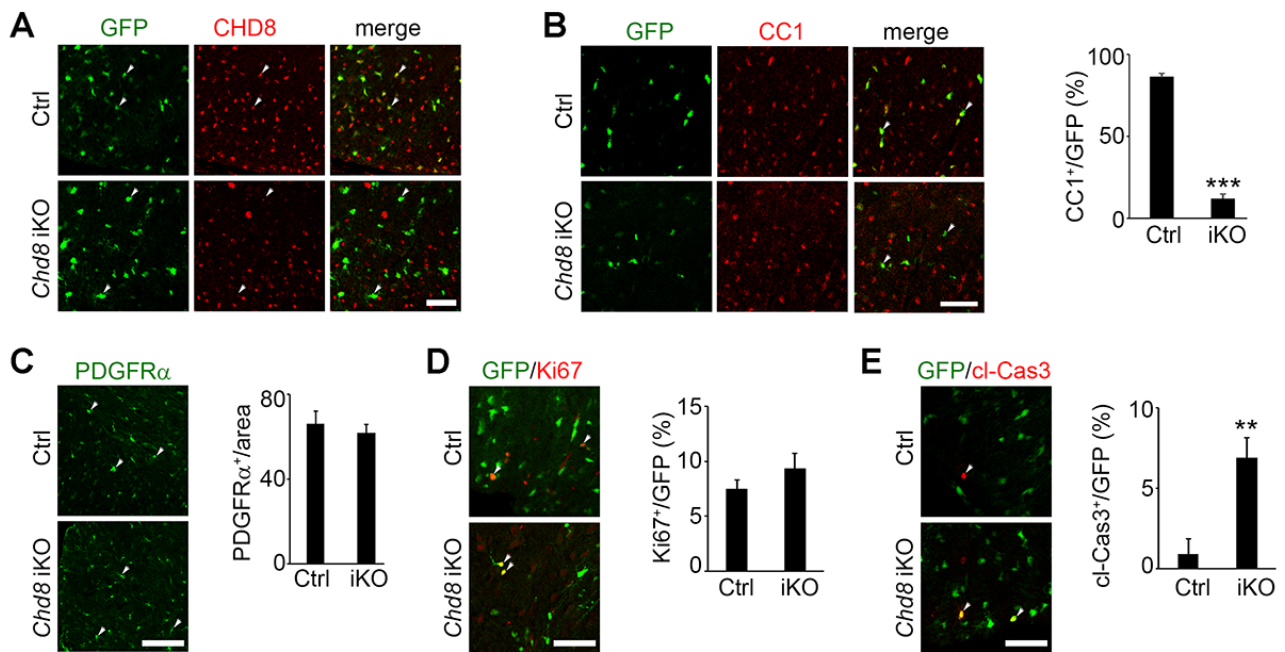

**Figure S4. Inducible *Chd8* ablation in OPC cells impairs oligodendrocyte differentiation and survival but does not affect the OPC proliferation and number. Related to Figure 4.**

A) The spinal cord of control and *Chd8* OPC-iKO mice at P14 were stained with CHD8. Scale bar, 50  $\mu$ m.

B) Left, Immunostaining of CC1 on the spinal cord of control and *Chd8* OPC-iKO mice. Scale bar, 100  $\mu$ m. Right, Quantification of CC1<sup>+</sup> oligodendrocyte cell numbers in the spinal cord of control and *Chd8* OPC-iKO mice at P14 (n = 4 independent experiments; \*\*\* p < 0.001, two-tailed unpaired Student's t test).

C) Left, Immunostaining of PDGFR $\alpha$  on the spinal cord of control and *Chd8* OPC-iKO mice. Scale bar, 100  $\mu$ m. Right, Quantification of PDGFR $\alpha$ <sup>+</sup> oligodendrocyte cell numbers in the spinal cord of control and *Chd8* OPC-iKO mice at P14.

D) Left, Immunostaining of Ki67 on the spinal cord of control and *Chd8* OPC-iKO mice. Scale bar, 100  $\mu$ m. Right, Percentage of cleaved Ki67<sup>+</sup> cells among GFP<sup>+</sup> OPCs in the spinal cord of control and *Chd8* OPC-iKO mice at P14.

E) Left, Immunostaining of cleaved Caspase3 on the spinal cord of control and *Chd8* OPC-iKO mice. Scale bar, 100  $\mu$ m. Right, Percentage of cleaved Caspase3<sup>+</sup> cells among GFP<sup>+</sup> OPCs in the

spinal cord of control and *Chd8* OPC-iKO mice at P14. (n = 4 independent experiments; \*\*\* p < 0.001, two-tailed unpaired Student's t test).

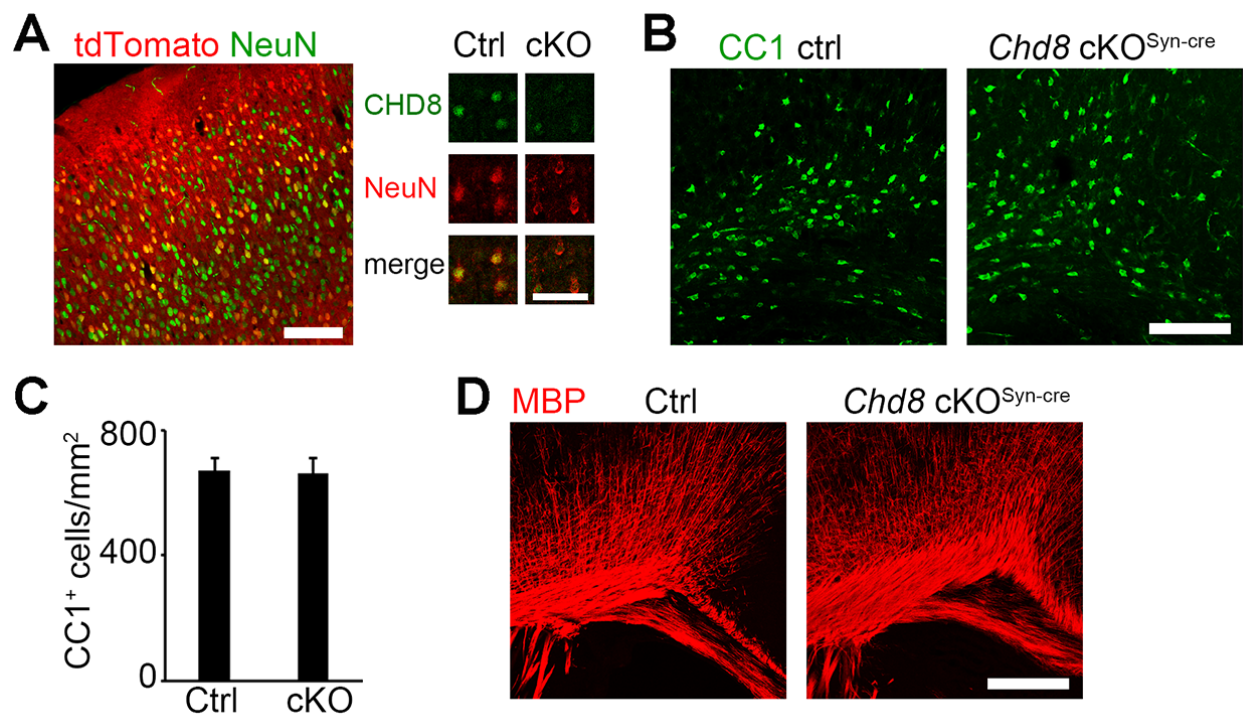

**Figure S5. *Chd8* ablation in Synapsin1-Cre-expressing neurons does not impair oligodendrocyte differentiation. Related to Figure 4.**

A) Left: tdTomato reporter expression in NeuN<sup>+</sup> neurons in the cortex of Synapsin1-Cre transgenic mice at P14. Scale bar, 100  $\mu$ m. Right: Immunostaining of CHD8 and NeuN in the cortices of control and *Chd8* cKO<sup>Syn-cre</sup> mice at P14. Scale bar, 50  $\mu$ m.

B) Immunostaining of CC1 in the cortices of control and *Chd8* cKO<sup>Syn-cre</sup> mice at P14. Scale bar, 100  $\mu$ m.

C) Quantification of CC1<sup>+</sup> oligodendrocytes in the cortices of control and *Chd8* cKO<sup>Syn-cre</sup> mice.

D) Immunostaining of MBP in the cortices of control and *Chd8* cKO<sup>Syn-cre</sup> mice at P14. Scale bar, 100  $\mu$ m.

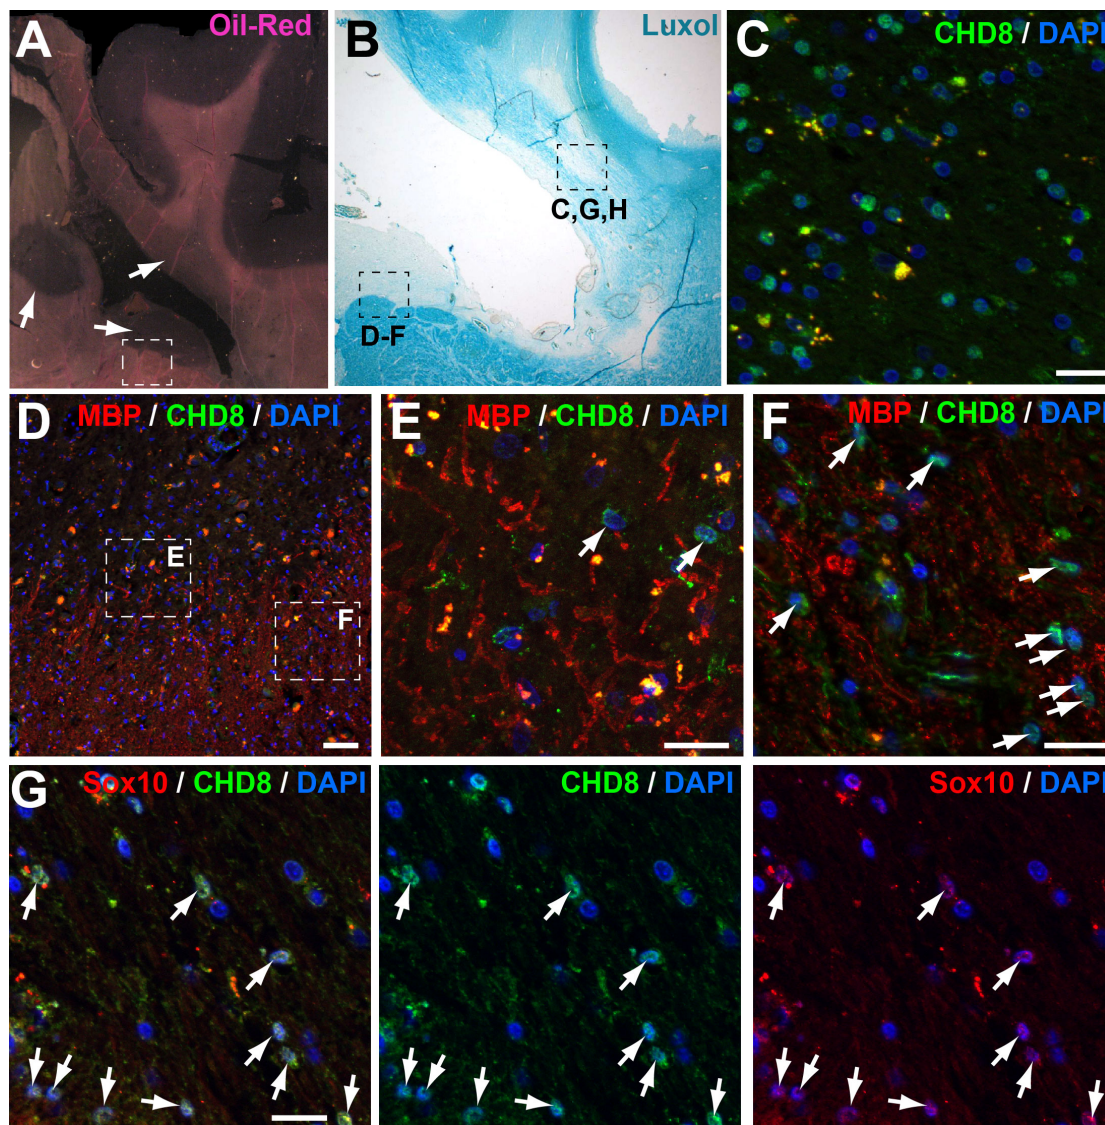

**Figure S6. CHD8 expression in the brain lesion of multiple sclerosis patient tissues. Related to Figure 5.**

- A) Oil-Red staining showing white matter demyelinated areas as darker zones (arrows).
- B) Luxol staining in adjacent section to tissue in (A) showing demyelinated areas (light blue staining). Insets indicated areas used in immunofluorescence staining following panels.
- C) Demyelinated white matter track showing many small nuclei expressing CHD8 with typical oligodendrocytes alignments. Scale bars, 50  $\mu\text{m}$  for panels C-G.
- D) MBP staining showing the border area of re- and demyelination.

E, F) High magnification showing CHD8<sup>+</sup> nuclei (arrows) in remyelinating areas. Arrows show CHD8<sup>+</sup> cells.

G) High magnification picture showing that CHD8<sup>+</sup> cells are labelled by an anti-Sox10 antibody (arrows).



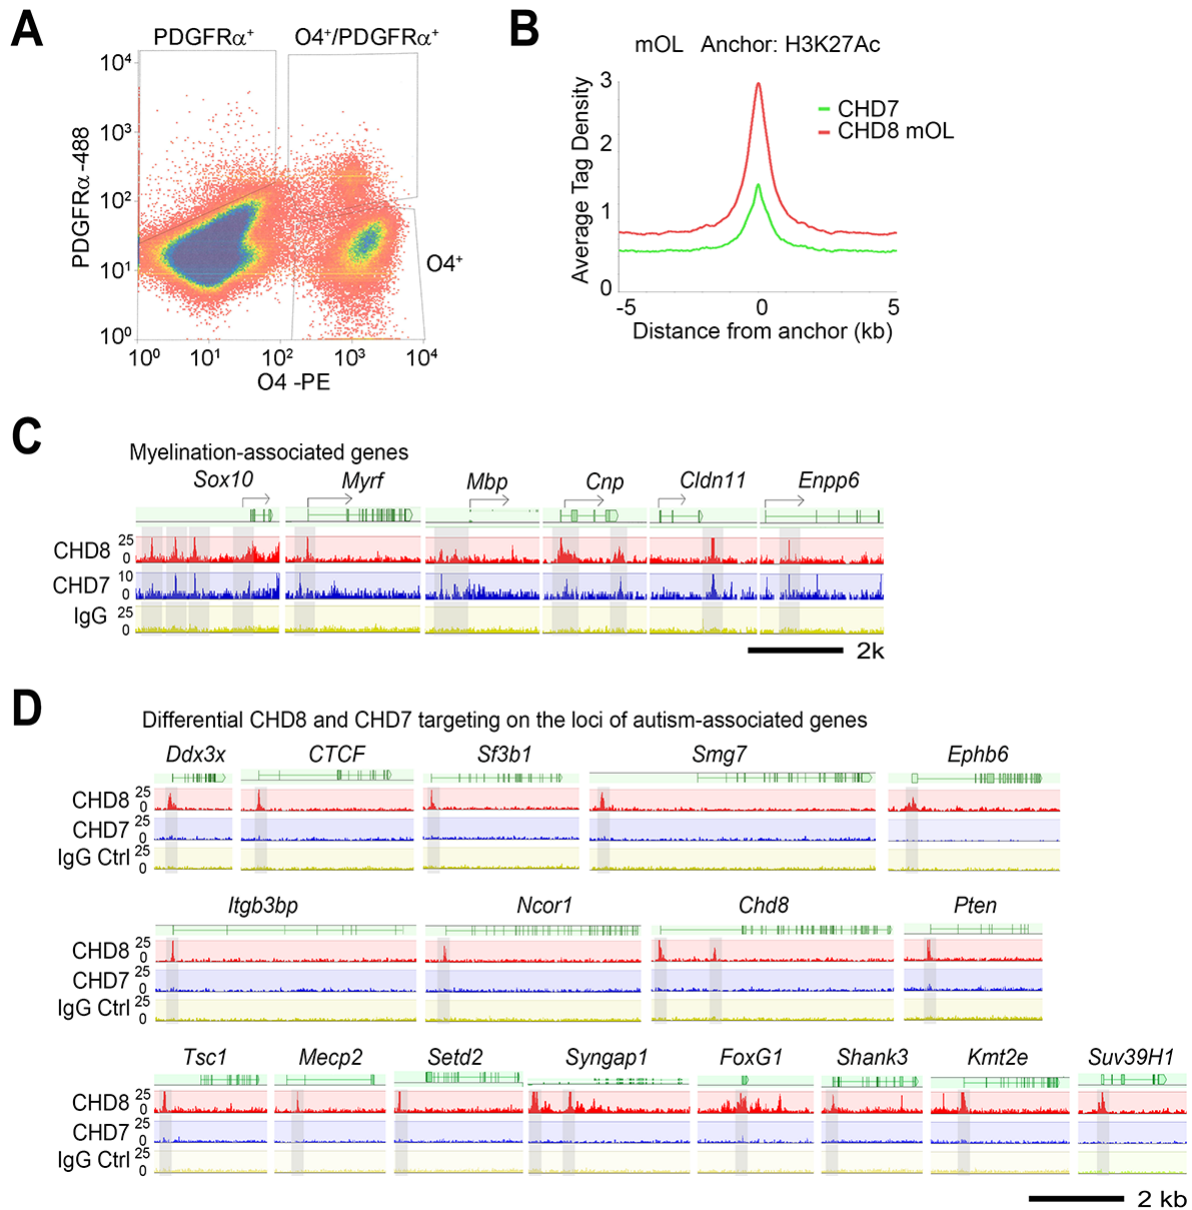

**Figure S7. Comparison of CHD8 and CHD7 targeting to myelin-associated genes and autism-associated genes. Related to Figure 6.**

A) Graph of FACS plots showing PDGFR $\alpha$  versus O4 expression intensity for isolating PDGFR $\alpha$ <sup>+</sup>/O4<sup>+</sup> cells from control and *Chd8* cKO mouse cortices at P7.

B) The signal density of CHD8 and CHD7 peaks are plotted relative to H3K27Ac peaks in mOL.

C) Representative tracks of myelin-associated genes bound by CHD8 and CHD7 in mOL.

D) Representative tracks of autism-associated genes targeted by CHD8 and CHD7 in OPCs.

### **Supplemental Movies**

**Movie S1. *Chd8*-cKO mice exhibited tremors at P14. Related to Figure 2.**

**Movie S2. *Chd8*-cKO mice developed tonic seizures at P18. Related to Figure 2.**
